# Supplementary material
Source: PubMed Central journal article supplement (PMC2925463)
Supplement: NIHMS225750-supplement-1_si_001.pdf [file NIHMS225750-supplement-1_si_001.pdf]

**MacroSEQUEST: Efficient candidate-centric searching and high resolution correlation analysis for large-scale proteomics datasets**

Brendan K. Faherty<sup>1</sup> and Scott A. Gerber<sup>1,2,\*</sup>

**Supplementary Information**

1. Department of Genetics, Dartmouth Medical School, Lebanon, NH 03756
2. Norris Cotton Cancer Center, Lebanon, NH 03756

\* to whom correspondence should be addressed: [scott.a.gerber@dartmouth.edu](mailto:scott.a.gerber@dartmouth.edu)

a

```
./Macro8m -h
USAGE Macro <-i exp list file> <-d database>
ARGUMENTS
  -i FILE      exp list file is the path to the list of
                experimental spectra file (a list of dtas, one per line)
  -d FILE      database is a Fasta file to look through
  -s STRING    OPTIONAL static modifications string consisting of
                residues and masses, ie: -s C:57.021461
  -m STRING    OPTIONAL dynamic modifications string consisting of
                residues and masses, ie: -m M:15.9949146221,STY:
                79.9663304084
  -e STRING    enzyme, currently 'trypsin-full' (DEFAULT),
                'trypsin-partial' and 'none'
  -c INT       number missed cleavage events per peptide, default 3
  -t FLOAT     searching match tolerance in Daltons, default 1.1Da
  -p FLOAT     searching match tolerance in PPM.
                * USE OVERRIDES -t and used 0.1Da. bin size
  -b FLOAT     binning MS2 peak tolerance in Daltons, default
                1.0Da. Used in scoring
  -o FILE      file name to use for outputting csv file.
                Default is Macro-date-time.csv
  -l INT       print level, default 0 - quiet. 1:info,
                2:progress, 3: debug, 4: verbose debug
  -h           print out a usage message
  -v           print out versioning information
```

b

```
HeLa90/HeLa90.12459.12459.2.dta
HeLa90/HeLa90.1178.1178.3.dta
HeLa90/HeLa90.0884.0884.3.dta
HeLa90/HeLa90.14463.14463.3.dta
HeLa90/HeLa90.1686.1686.2.dta
HeLa90/HeLa90.10834.10834.2.dta
HeLa90/HeLa90.14363.14363.2.dta
HeLa90/HeLa90.13850.13850.2.dta
HeLa90/HeLa90.10405.10405.2.dta
HeLa90/HeLa90.4545.4545.3.dta
```

**Figure S-1: Usage and command line arguments for Macro. A)** “Help” information regarding usage for the current version of Macro. **B)** Formatting of the input file list.

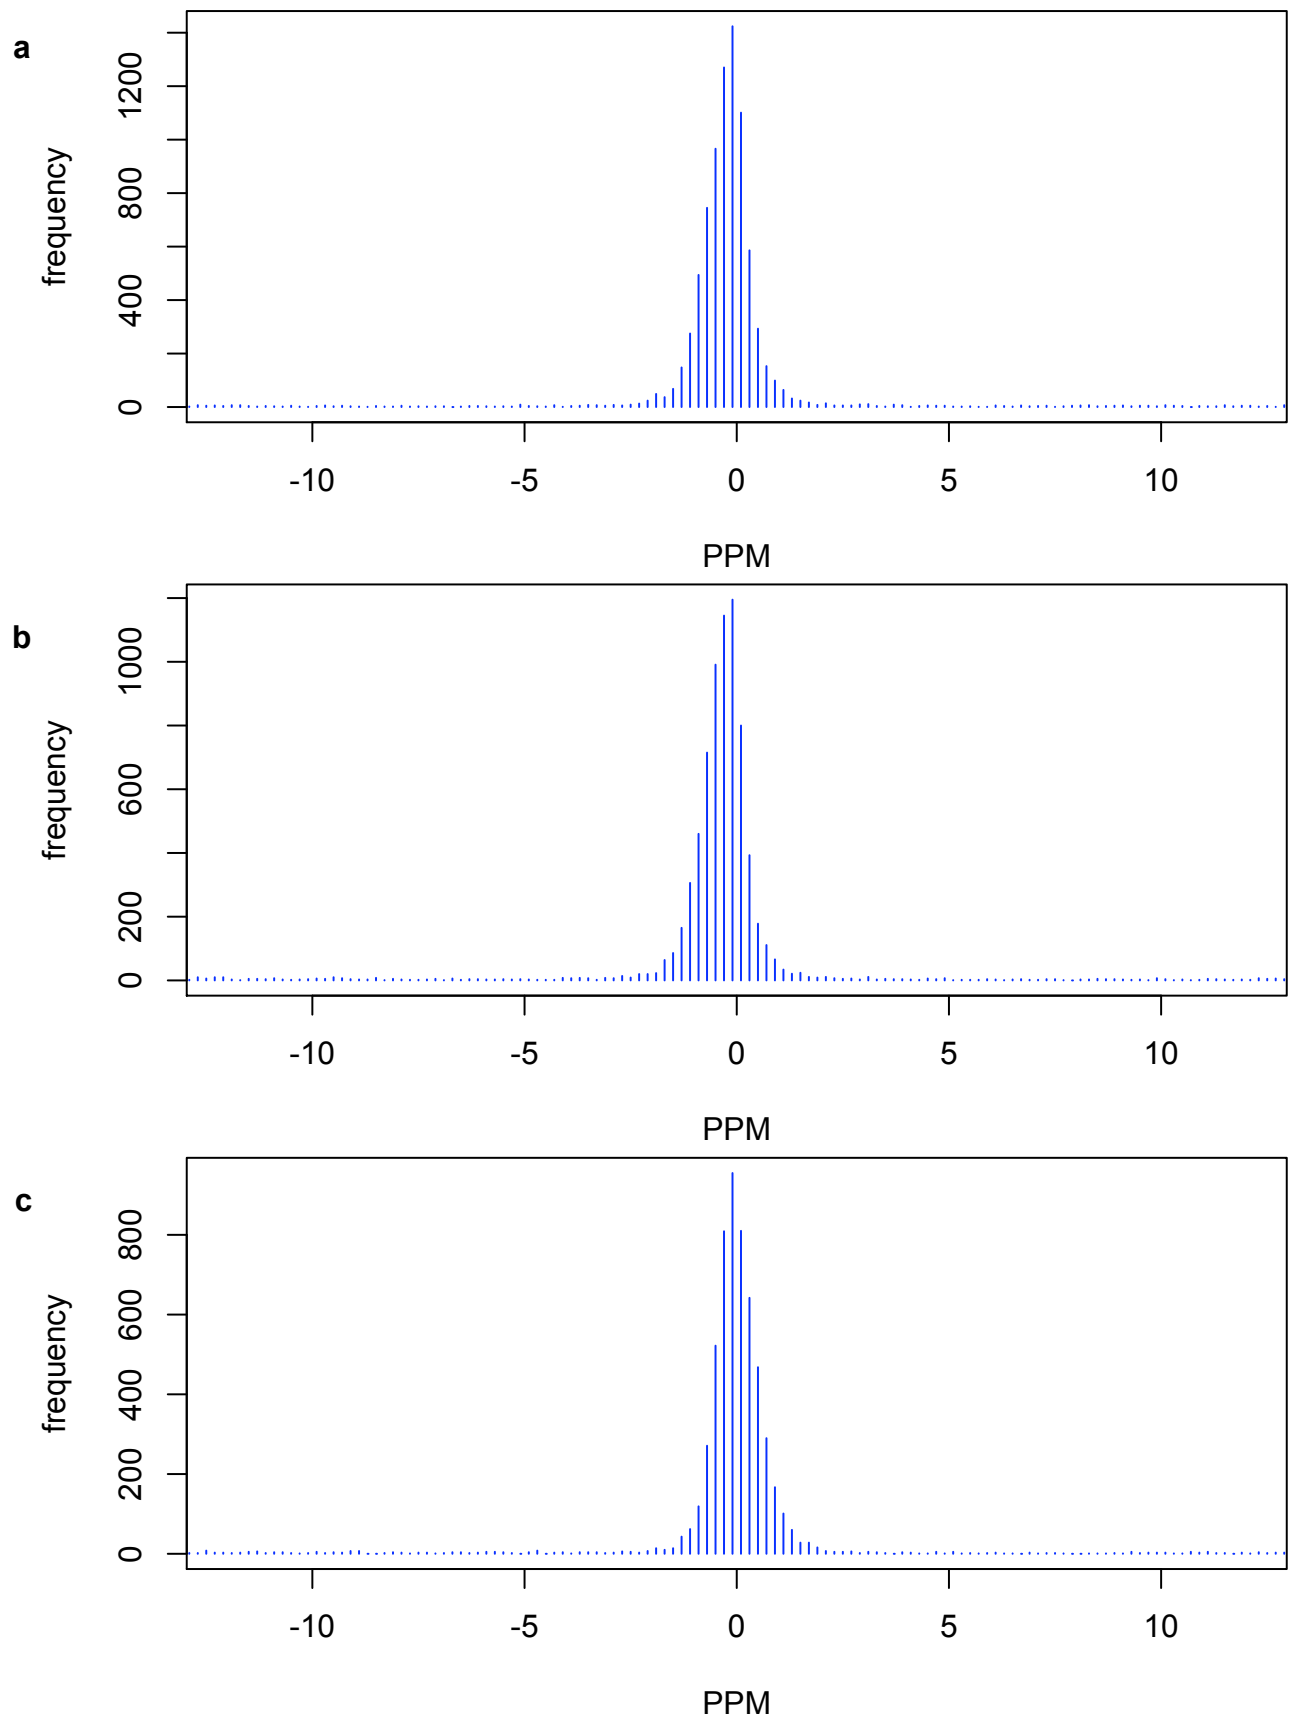

**Figure S-2: Precursor ion mass measurement accuracy distributions.** Precursor ion mass measurement accuracy distributions for the **A)** yeast, **B)** human, and **C)** human phosphopeptide datasets used in this work.

**a**

|                                  | <b>Yeast 90</b> | <b>HeLa 90</b> | <b>HeLa Phos 90</b> |
|----------------------------------|-----------------|----------------|---------------------|
| <i>number spectra</i>            | 12,979          | 13,129         | 10,761              |
| <i>number tryptic peptides</i>   | 3,042,150       | 27,492,945     | 331,035,378         |
| <i>number matched peptides</i>   | 1,769,687       | 16,851,426     | 321,399,594         |
| <i>number scoring operations</i> | 29,053,497      | 277,789,229    | 1,430,087,343       |
| <i>number modifications</i>      | 461,154         | 4,700,878      | 307,323,410         |

**b**

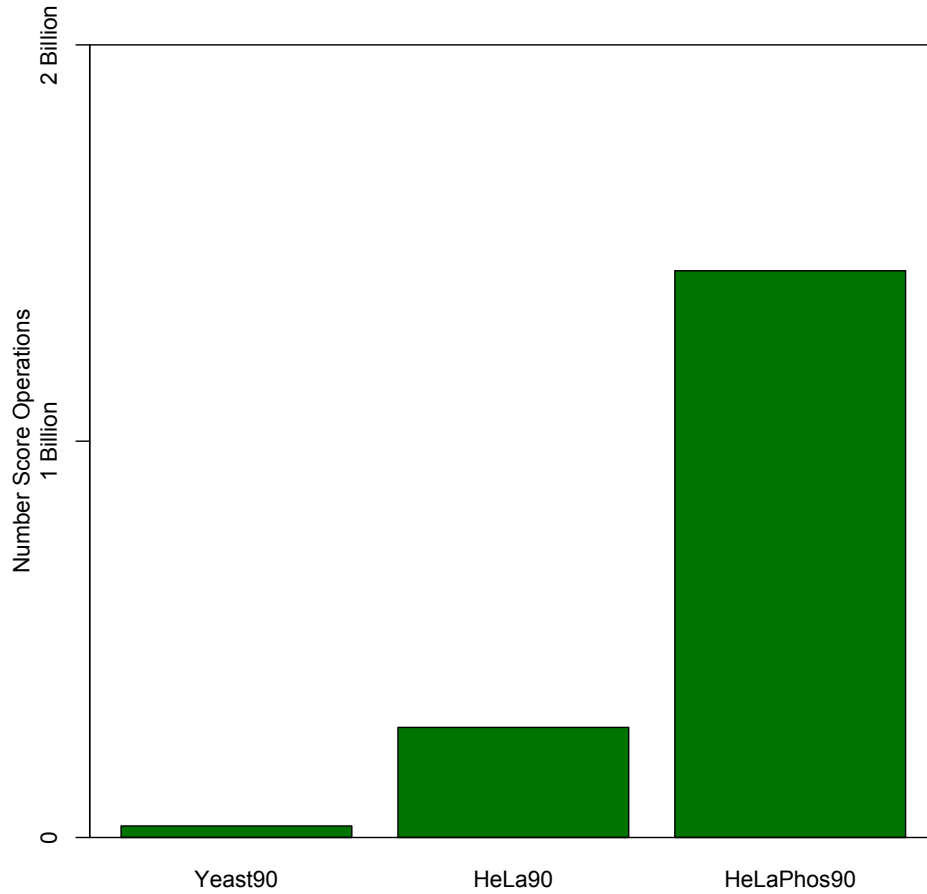

**Figure S-3: Scoring summary statistics.** Relevant scoring statistics for the datasets used in this work.

**a**

| MS/MS bin width | cutoffs   |        |        |        | TP Number | FP Rate |
|-----------------|-----------|--------|--------|--------|-----------|---------|
|                 | deltaCorr | 2+     | 3+     | 4+     |           |         |
| 1.000 Da.       | 0.08      | 0.7142 | 0.8786 | n/a    | 3408      | 0.38%   |
| 0.750 Da.       | 0.08      | 0.7142 | 0.8786 | n/a    | 3408      | 0.38%   |
| 0.500 Da.       | 0.08      | 0.5922 | 0.7759 | 0.9996 | 3690      | 0.46%   |
| 0.250 Da.       | 0.08      | 0.4324 | 0.6255 | 0.9109 | 3755      | 0.45%   |
| 0.100 Da.       | 0.08      | 1.4979 | 0.4738 | 0.6743 | 3889      | 0.75%   |
| 0.075 Da.       | 0.08      | 1.3506 | 0.4285 | 0.6910 | 4009      | 0.82%   |
| 0.050 Da.       | 0.10      | 1.3736 | 0.4682 | 0.5915 | 4029      | 0.77%   |
| 0.025 Da.       | 0.1       | 0.9593 | 0.3594 | 0.5058 | 4244      | 0.97%   |
| 0.010 Da.       | 0.10      | 1.2926 | 1.0167 | 1.4701 | 3968      | 0.93%   |

**b**

| Search             | cutoffs   |        |        |        | TP Number | FP Rate |
|--------------------|-----------|--------|--------|--------|-----------|---------|
|                    | deltaCorr | 2+     | 3+     | 4+     |           |         |
| 1.1 Da. / 1.0 Da.  | 0.08      | 0.7142 | 0.8786 | n/a    | 3408      | 0.38%   |
| 10 PPM / 1.0 Da.   | 0.08      | 1.4430 | 1.5871 | 1.7966 | 3596      | 0.95%   |
| 1.1 Da / 0.025 Da. | 0.10      | 0.9593 | 0.3594 | 0.5058 | 4244      | 0.97%   |
| 10 PPM / 0.025 Da. | 0.10      | 1.1230 | 1.1600 | 1.2632 | 4109      | 0.92%   |

**Table S-1: True positive determination statistics.**
